1 **Title:** Multidimensionality in the thermal niches of dung beetles could limit species'  
2 responses to temperature changes

3 **Running Title:** Thermal niche multidimensionality

4

5 Joaquín Calatayud<sup>1</sup>, Joaquín Hortal<sup>2</sup>, Jorge Ari Noriega<sup>3</sup>, Ángel Arcones<sup>2</sup>, Verónica R.  
6 Espinoza<sup>4</sup>, Noemí Guil<sup>2</sup>, Jorge M. Lobo<sup>2</sup>

7

8 1- Departamento de Biología y Geología, Física y Química inorgánica. Universidad Rey  
9 Juan Carlos, C/ Tulipán s/n, Móstoles, Madrid, 28933 Spain

10 2- Department of Biogeography and Global Change, Museo Nacional de Ciencias  
11 Naturales (MNCN-CSIC), C/José Gutiérrez Abascal, 2, Madrid, 28006 Spain

12 3- Laboratorio de Zoología y Ecología Acuática – LAZOE, Universidad de los Andes,  
13 Bogotá, Colombia

14 4- Facultad de Medicina Veterinaria y Zootecnia. Universidad Central del Ecuador,  
15 Ecuador

16 **Corresponding author contact information:** Joaquín Calatayud; +34 601395450;  
17 j.calatayud.ortega@gmail.com

18

### 19 **Abstract**

20 Understanding the consequences of climate change requires understanding how  
21 temperature controls species' responses across key biological aspects, as well as the  
22 coordination of thermal responses across these aspects. We study the role of temperature  
23 in determining the species' diel, seasonal, and geographical occurrence, using dung  
24 beetles as a model system. We found that temperature has relatively low –but not  
25 negligible– effects in the three spatiotemporal scales, once accounting for alternative  
26 factors. More importantly, the estimated thermal responses were largely incongruent  
27 across scales. This shows that species have multidimensional thermal niches, entailing  
28 that adjustments to fulfil temperature requirements for one biological aspect, such as  
29 seasonal ontogenetic cycles, may result in detrimental effects on other aspects, like diel  
30 activity. These trade-offs can expose individuals to inadequate temperatures, reducing  
31 populations' performance. Paradoxically, the relatively weak effects of temperature we  
32 found may have serious consequences for species' responses to warming if temperature  
33 regulates essential aspects of species' biology in divergent ways.

34

35 **Keywords:** biological scale, daily activity, geographic distribution, niche dimensionality,  
36 phenology, physiological trade-offs

37

### 38 **Introduction**

39 Temperature is fundamental for the efficient capture and management of the energy that  
40 maintains living organisms (Brown et al. 2004). Temperature variations affect the  
41 abundance and distribution of species (Angilletta 2009), the variability of ecological  
42 systems (Wang et al. 2009), and even the history of life and biodiversity on Earth itself  
43 (Schwartzman 1999, Mayhew et al. 2008). Indeed, temperature plays a critical role in  
44 controlling key aspects such as species' spatiotemporal distribution, physiological activity  
45 or individual growth rates (Somero 2005, Thackeray et al. 2016, Scranton &  
46 Amarasekare 2017, Madrigal-González et al. 2018), among many other things. Here, the  
47 effects of temperature on species' geographic distributions and seasonal and diel activities  
48 are of particular interest since variation in these aspects can have dramatic consequences  
49 for their ecological performance and persistence (Edwards & Richardson 2004,  
50 Schweiger et al. 2008, Rader et al. 2013). The ongoing climate changes are drastically  
51 modifying the spatial and temporal organization of biodiversity (Chapin III & Diaz  
52 2020), which is leading to spatial and seasonal decouples of interacting species (Sheldon  
53 et al. 2011) and, thus, to the disruption of food webs and ecosystem services (Román-  
54 Palacios & Wiens 2020). Ecologists and climatologists have accumulated a large amount  
55 of evidence on these effects during recent decades, which are especially relevant for  
56 ectotherms (Paaijmans et al. 2013). Despite this evidence, how temperature responses  
57 integrate across different species' aspects is largely unknown. To obtain this knowledge  
58 is crucial because incongruous responses can lead to incompatible adjustments to  
59 temperature changes along biological aspects, compromising the species' performances  
60 under climate change.

61 Delimiting the actual effect of environmental temperature on the distribution and  
62 abundance of species may become difficult when other variables that are either spatially  
63 or temporally correlated with temperature are considered simultaneously. For instance,  
64 the latitudinal distribution of species in the Northern Hemisphere is associated with  
65 historical events and dispersal limitations, whose effects generate geographical patterns  
66 that can be confounded with those of temperature variations (Araújo et al. 2008, Hortal et  
67 al. 2011, Calatayud et al. 2016, 2019). Similarly, the apparent relationships between  
68 temperature and either seasonal or diel activities may be indeed conditioned by life-

69 history constraints related with the time required to complete individual development,  
70 species' voltinism, the phase in which overwintering occurs, photoperiod limitations,  
71 light requirements, and the reliance on solar radiation independently on the  
72 environmental temperature (Bradshaw & Holzapfel 2007, 2010, Teder 2020). Hence,  
73 assessing the predictive value of temperature in accounting for the spatial and temporal  
74 variations in species occurrence and abundance would require considering any alternative  
75 variables that could play a significant role in these variations.

76 Experimental setups can help unravel the “true” role of temperature in driving  
77 geographical, seasonal and diel patterns for some model organisms while controlling for  
78 other variables (Angilletta 2009). However, experiments based on artificial thermal  
79 gradients can subject individuals to new and unrealistic stress conditions, thereby  
80 providing overestimated projections of species responses (Guo et al. 2020). Alternatively,  
81 one could explore the contribution of temperature using observational data where the  
82 variations in temperature and other complementary predictors are decoupled. For  
83 example, the effects of temperature and solar radiation can be teased apart using diel  
84 activity from consecutive days that showed substantial variations in temperature (*i.e.*,  
85 while presenting almost equal sunlight incomings). Similarly, the effects of temperature  
86 and day length can be teased apart using seasonal data along steep temperature gradients,  
87 with nearly equal day lengths (such as *e.g.*, elevational gradients). Finally, the role of  
88 temperature in determining the species' distribution can be assessed by comparing  
89 geographical areas with different temperature regimens. That is, if temperature is an  
90 important variable, we should find similar responses under different background  
91 temperatures.

92 The relevance of temperature in accounting for the spatiotemporal variation in  
93 species occurrence and abundance may thus be estimated from observational data,  
94 comparing the results from including or not alternative predictors to account for  
95 complementary causal factors. Temperature will stand out as a relevant factor across  
96 different biological scales if its association with several species' responses is high  
97 throughout different spatiotemporal dimensions, but also if such responses are congruent  
98 across dimensions. The congruence in thermal responses to diel, seasonal and  
99 geographical gradients would support the universal and homogeneous role of temperature  
100 in delimiting the occurrence and abundance of species. Note here that expectations are  
101 that different mechanisms are behind the response to temperature variations associated  
102 with geography, seasonality and diel rhythms. For instance, daily temperature variations

103 should also be related to changes in light or other environmental factors that can generate  
104 behavioural, endocrine, and physiological diel rhythms (Levy et al. 2019). In contrast,  
105 responses to seasonal temperatures should be associated with the annual rhythms and the  
106 need to synchronize life history phases with seasonal variations in climate (Saunders  
107 2020). On the other hand, responses to geographical variations in temperature should  
108 relate to local adaptation processes acting at the population level, and likely involving the  
109 above-mentioned individual tolerances and ontogenetic timing, as well as other essential  
110 species attributes (Sunday et al. 2019).

111 Despite these differences, a certain level of congruence in the responses would  
112 indicate the consistent role of temperature as a holistic and predictable driver of key  
113 biological aspects. Such congruence would be evident, for example, if species occurring  
114 in colder regions are also active during colder periods of the year and at colder hours of  
115 the day in areas of milder climate. Such hypothesized thermal congruence is fundamental  
116 to respond adequately to global warming, as decoupling responses across different  
117 spatiotemporal gradients may expose local populations to critical temperatures, thus  
118 compromising their long-term persistence. For instance, if seasonal and diel responses to  
119 temperature are decoupled, species might not be able to adjust seasonal cycles as much as  
120 it would be necessary to prevent individuals from facing critical temperatures during diel  
121 activities. Following this line of evidence, studying the congruence of thermal responses  
122 across evolutionary lineages is also important because a marked phylogenetic signal in  
123 thermal niches would also point to the relevance of temperature changes. That is, if  
124 thermal adaptations are evolutionarily conserved, species might present limited ability to  
125 modify their thermal responses, being unable to cope with climate warming. Should this  
126 be true, phylogenetic biases in the potential effects of climate warming would be also  
127 expectable. Despite the relevance of studying the consistency of thermal responses across  
128 spatiotemporal gradients and evolutionary lineages, integrative studies on this topic are  
129 lacking.

130 Here we study the thermal responses associated with geographical, seasonal, and  
131 diel temperature variations using several temperate dung beetle species as a model  
132 system. Dung beetles are capable to self-regulate their body temperature and produce heat  
133 depending on their body size (Verdú & Lobo 2008, Verdú et al. 2012) a physiological  
134 adaptation directly linked to the need of a quick dispersal response to exploit an  
135 ephemeral resource. In addition, they feed on cattle from domestic and wild animals,  
136 participating in nutrient cycling and seed dispersion (Nervo et al. 2017, Milotić et al

137 2019), and thus, providing important ecosystem functions. These characteristics make  
138 dung beetles an ideal and important group to study thermal responses.

139 Specifically, we evaluated the responses of dung beetles to changes in  
140 temperature associated to: (i) diel rhythms across three consecutive days with contrasted  
141 temperatures; (ii) seasonal rhythms across six sites located at different elevations; and  
142 (iii) geographical ranges along five river basins in the Iberian Peninsula (Fig. 1). We  
143 hypothesized that if temperature is the main factor determining the activity and  
144 distribution of dung beetles, its effect should be observed along the three considered  
145 spatiotemporal gradients, and its relevance would be higher if the effects of other  
146 alternative and/or complementary factors are low. Furthermore, congruence in the  
147 different species' thermal responses to diel, seasonal and geographical changes would be  
148 expected if the importance of temperature is independent of the spatiotemporal context.  
149 On the contrary, a low explanatory capacity of temperature and a lack of congruence in  
150 its effects across the three spatiotemporal gradients would support a limited and  
151 dissimilar role of temperature depending on the spatiotemporal context. Finally, if species  
152 are evolutionarily limited to adapt to new thermal regimens, we expect thermal niches to  
153 be phylogenetically conserved.

154

## 155 **Material and methods**

### 156 *Data origin*

157 We use data on 16 Iberian dung beetle species of the family Scarabaeidae (ten from  
158 Aphodiinae and six from Scarabaeinae subfamilies). These species were selected because  
159 they occurred in at least 10% of the samples of the three datasets considered, covering  
160 different spatial and temporal extents (see below). All considered species (Table 1) are of  
161 small body size, with body weights far smaller than 1.9 g (0.2 g at most), the threshold  
162 from which endothermy is thought to appear in this group of beetles (Verdú et al. 2006).  
163 Temperature–occurrence associations for all these species were examined along: (i) five  
164 geographical areas of similar extent but different temperature regimes within the Iberian  
165 Peninsula (geographical dataset or GD); (ii) six sites placed across a steep elevational  
166 range in Central Iberia, and sampled during the same dates but differing in their  
167 environmental temperatures (seasonal dataset or SD); and (iii) three consecutive days  
168 with similar daily variations but different weather conditions in a single locality near the  
169 centre of the same elevational range (diel dataset or DD).

170

171 *Geographical Dataset.* The GD is divided in five study areas, corresponding to the major  
172 river basins of the Iberian Peninsula (Ebro, Duero, Tajo, Guadiana and Guadalquivir;  
173 limits extracted from HydroBASINS data available at [www.hydrosheds.org](http://www.hydrosheds.org), Lehner &  
174 Grill 2013, Fig. 1a). These natural areas were used since their borders correspond with  
175 marked geographical accidents, which are expected to act as dispersal barriers.  
176 Furthermore, they are relatively similar in extent (areas ranging from  $5.6 \times 10^4$  to  $9.7 \times$   
177  $10^4$  km<sup>2</sup>) and almost follow a latitudinal gradient, hence showing contrasting  
178 environmental temperatures (Fig. 1b). In each of these basins, we collected all  
179 georeferenced occurrences of the selected species from GBIF ([www.gbif.org](http://www.gbif.org), accessed  
180 May 2020) and additional published sources (Hortal & Lobo 2011). As this kind of data  
181 is biased due to historically uneven sampling effort (Lobo et al. 2018), the occurrences  
182 were pooled within UTM grid cells of 10 x 10 km spatial resolution. This grain was  
183 selected because it corresponds to the effective resolution of most of the occurrence  
184 information in the dataset, and it is appropriate to avoid the effects of oversampled  
185 localities while retaining a reasonable climatic detail. The frequency of each species'  
186 occurrence data in temperature bins of 1°C (ranging from -3 to 20°C, n=24) was  
187 calculated for each river basin ( $24 \times 5 = 120$ ), and these figures were used as dependent  
188 variables in the subsequent regression analyses.

189

190 *Seasonal dataset.* Six sites along an elevational gradient located in the Sierra de  
191 Guadarrama (Central Spain) (Fig. 1a, Espinoza 2016) were used to explore the effect of  
192 temperature variations in SD. Elevations range from 755 to 1900 m a.s.l., separating sites  
193 approximately 200 m a.s.l.. Each survey site was sampled approximately every three  
194 weeks, totalling fourteen times from May 2012 to June 2013. We choose this elevation  
195 gradient because these sites show considerable variations in temperature during the whole  
196 period of the surveys (Fig. 1b). The sampling protocol in each periodical sample  
197 consisted of five pitfall-traps baited with fresh cattle dung and separated around 30 m  
198 from each other. Traps were placed in open habitats to avoid potential habitat and shadow  
199 effects and were active during 48 h. The individuals of these traps were pooled together,  
200 obtaining an estimation of each species' abundance per elevation site and date ( $6 \times 14 =$   
201 84), which were used as response variables in subsequent statistical analyses.

202

203 *Diel Dataset.* Temperature effects on diel activity were assessed using dung beetle data  
204 from a grassland located next to El Ventorrillo MNCN field station, placed in the Sierra  
205 de Guadarrama at an approximate elevation of 1500 m a.s.l. (Fig. 1a). This locality was  
206 chosen as it shows a high diversity of dung beetles (between 30 and 40 species belonging  
207 to the considered subfamilies; Cuesta & Lobo 2019). We sampled three consecutive days  
208 (April 28<sup>th</sup>–30<sup>th</sup> 2015) that showed contrasting temperatures, with around 8 °C of  
209 difference between the mean temperatures of the coldest and the hottest days (Fig. 1b).  
210 Each day, ten pitfall traps baited with fresh cattle dung were distributed around a  
211 circumference of approximately 50 m. of radius (*i.e.*, traps were at least 30 m apart from  
212 each other). Since we intended to measure the flight activity during short periods, the bait  
213 was introduced into a nylon stocking piece to avoid the stagnancy of beetle individuals  
214 within the dung bait along different sampling events. We checked all traps every 30 min.  
215 from dawn to dusk (approximately from 7:30 am to 7:00 pm, n=23), collecting all  
216 individuals to subsequently identify them in the laboratory. Traps were also checked  
217 during the night to discard nocturnal activity. Individuals from the ten traps were pooled  
218 together, obtaining an estimation of the abundance of active individuals from each  
219 species each 30 min (23 x 3 = 69), which were further used as dependent variables.

220

### 221 *Temperature measures and alternative correlates*

222 Temperature measures were obtained from different standardized methods for each one  
223 of the different spatio-temporal scales considered, but trying to maintain a considerable  
224 degree of congruence among them. For the *Geographical Dataset*, we obtained mean  
225 annual temperatures at a 30 sec resolution from the WorldClim database (see  
226 [www.worldclim.org](http://www.worldclim.org), Hijmans et al. 2005). We preferred mean annual temperatures over  
227 monthly average figures since the precise seasonal activity over the complete study area  
228 was unknown for most of the species. Nevertheless, spring and autumn temperatures (the  
229 seasons when phenological peaks occur for most species) were positively correlated with  
230 mean annual temperatures (Pearson's  $r = 0.99$  and  $0.97$ , respectively), so we assume that  
231 mean annual temperature is a reasonable proxy for both of them.

232 For the *Seasonal Dataset*, we set up a temperature data logger in each of the  
233 elevational points during the whole period of the study. This device was placed in the  
234 shadow at one meter from the ground to escape from extreme temperatures due to  
235 insolation, mimicking the meteorological stations on which WorldClim data are based on.

236 Temperature was recorded each 10 min. and we used the mean daily temperature when  
237 pitfall-traps were active.

238 In the case of the *Diel Dataset*, temperature measurements were taken using five  
239 data loggers placed in the study site just in the centre of the circumference formed by the  
240 traps. Data loggers were placed to recover temperature measurements from the different  
241 microclimatic conditions available for dung beetles: two at one meter over the ground, in  
242 the sun and shadow; another two directly on the ground, also both in the sun and shadow;  
243 and one buried at 10 cm depth. Preliminary results showed that the mean temperatures  
244 from the data logger placed on the ground in the sun were those that best correlated with  
245 the species' diel activity, so we used these measurements in subsequent analyses.  
246 Temperature was recorded each minute, and average temperatures during the 30 min  
247 before traps were checked were used as predictors.

248 As previously stated, the effects of temperature measurements might be  
249 overestimated due to its collinearity with other factors with which it shares spatial (in the  
250 case of GD) or temporal structure (in the case of SD and DD). We quantified this  
251 potential overestimation effect by using different “contrast variables”, alternative  
252 predictors which are often partly correlated with temperature but are either measures or  
253 proxies of other potential causal factors for dung beetle spatial and temporal responses.  
254 These alternative predictors were temperature availability and survey effort in the case of  
255 GD, day of the year for SD, and hour of the day in the case of DD. The effect of  
256 temperature on the frequency of occurrence (GD) or abundance (SD and DD) that is  
257 independent of these contrast variables was assessed as the “pure” effect of temperature  
258 variations that is independent of the range of temperatures available (GD), the period of  
259 the year (SD), and the hour of the day (DD) (see analytical methods below).

260 Temperature availability for each basin is the relative frequency of 10 x 10 km  
261 UTM cells in each 1°C temperature bin. This variable aims to represent the thermal  
262 spectrum available in each basin. Hence, a high explanatory capacity of this variable on  
263 the frequency of occurrence of a species would imply that the apparent thermal  
264 preference of this species can be simply because its spatial pattern of occurrence mimics  
265 the distribution of temperatures in the analyzed basin. Further, the typical correlation  
266 between the observed pattern of occurrence of a species and the spatial distribution of  
267 survey effort can also generate spurious correlations between species' frequency and  
268 temperature in each basin. This potential source of error was considered here by  
269 calculating the relative frequency for each 1°C temperature bin of all dung beetle records



270 included in the formerly mentioned databases and pooled within the 10 x 10 km UTM  
271 cells. Nevertheless, we found that this estimation of survey effort and temperature  
272 availability were highly and positively correlated in all basins (Pearson's  $r$  ranging from  
273 0.97 to 0.99), since the most frequent temperatures have been also surveyed more often,  
274 which implies that the surveys are randomly allocated within the available temperatures.  
275 Consequently, we discarded using survey bias as contrast variable, considering that the  
276 effect of temperature availability also includes differences in survey effort. In the case of  
277 SD data, the day of the year was obtained by first ordering the available dates from the  
278 day corresponding to the summer solstice (June 21<sup>th</sup> = 0 or 360), to subsequently convert  
279 these figures into radians and obtaining two circular variables by calculating their cosine  
280 and sine values. Thus, the summer-winter oscillation is represented by the cosine of the  
281 date and oscillates from 1 to -1, whereas the spring-autumn transition is represented by  
282 the sine of the date scale 1 to -1. Finally, the hour of the day (DD data) is simply codified  
283 as the number of minutes from dawn.

284

## 285 *Statistical analyses*

### 286 *Explanatory capacity of temperature*

287 We first explored the independent capacity of temperature to explain variations in dung  
288 beetle data in GD, SD, and DD. For each dataset, we conducted Generalized Linear  
289 Regression Models of the relative frequency or the abundance of each species as a  
290 function of temperature values. All data coming from the five basins (in GD), the six  
291 elevational sites (SD), and the three days (in DD) were considered at the same time in  
292 each one of the three models. A curvilinear quadratic function of temperature was  
293 included in all the cases to account for the typical unimodal performance curves of  
294 ectotherms (Huey & Kingsolver 1989). A negative binomial error distribution for the  
295 dependent variable was assumed to avoid overdispersion issues associated with the  
296 Poisson error distribution (Blasco-Moreno et al. 2019), and it was related to the set of  
297 predictors via a logarithmic link function. It is important to note that we did not include a  
298 term in the models to account for the different spatial (*i.e.*, basins and elevations) and  
299 temporal (*i.e.*, days) units. By doing so, we were ignoring other factors that may affect  
300 the distribution and activity of dung beetles, besides temperature and the contrast  
301 variables analyzed. However, this allows us to tease apart the effects of temperature and  
302 the formerly mentioned contrast variables with a spatial and temporal structure while  
303 avoiding model overparameterization. Hence, we fitted three supplementary GLMs

304 representing different hypotheses regarding the importance of temperature: (i) a full  
305 model where both temperature and contrast variables are included altogether, (ii) a model  
306 including only these contrast variables, and (iii) a null model where only the intercept  
307 was included. We assumed a linear relationship between the density of occurrence and  
308 temperature availability (GD); whereas in SD and DD, we assumed curvilinear  
309 relationships between abundance and contrast variables by including a quadratic term of  
310 both the number of minutes from dawn, and date sine and cosine. We used a deviance  
311 partition approach (Legendre 1993, see also Calatayud et al. 2019 for the same approach)  
312 to calculate the deviance explained by each set of variables alone (*i.e.*, temperature *vs.*  
313 contrast variables; herein, total pseudo  $R^2$ ) and once accounting for the collinearity with  
314 other variables (herein, partial pseudo  $R^2$ ). Model performance was assessed using the  
315 Akaike Information Criterion corrected for small sample size (AICc).

316

### 317 *Thermal niche attributes*

318 Deriving thermal niches from occurrence data typically provides a partial description of  
319 the whole potential response of the species (Sánchez-Fernández et al. 2012, Saupe et al.  
320 2018). However, occurrence-based thermal niches may nevertheless be characterized by  
321 different attributes such as the optimum temperature and niche breadth (Gouveia et al.  
322 2014, Löffler & Pape 2020, Fig. 2). The temperature optimum of each species was  
323 assessed by fitting quadratic curves in a GLM and calculating the maxima as their  
324 inflection point (see Villén-Pérez & Carrascal 2015 for a similar procedure). Thermal  
325 niche breadth was also obtained as the area under the curve of these fitted curves. Fitted  
326 values were normalized to reach a maximum value of one to make calculations  
327 comparable among datasets and species.

328 We evaluated the intraspecific dissimilarity in the thermal niches across different  
329 spatial and temporal scales, herein called “thermal lability”, using data from the different  
330 study units used in each dataset; that is, between river basins, elevation sites, and days  
331 (Fig. 2). Thermal lability between pairs of units was measured using the Simpson index  
332 as follows:

$$333 \quad S = \frac{\min(b,c)}{a + \min(b,c)},$$

334 where  $a$  represents the area under the curves where both curves overlap, and  $b$  and  $c$   
335 represent the independent areas under the curves in study units (see Fig. 2). The larger the  
336 overlap between the curves obtained at different scales, the smaller the thermal lability

337 will be. We computed this index for all pairs of units in each dataset (*i.e.*, for each pair of  
338 basins, each pair of elevations, and each pair of days) and then considered the maximum  
339 dissimilarity among all pairs from the same dataset, as this measure will provide a more  
340 realistic estimate of the potential thermal lability of each species.

341

#### 342 *Congruencies in thermal niches*

343 The congruence in the thermal niches of the different species derived from the three  
344 datasets (*i.e.*, GD, SD, and DD) was assessed using Spearman rank correlations between  
345 the deviance explained by temperature (*i.e.*, both for the total and partial pseudo  $R^2$ s), as  
346 well as the obtained temperature optima, thermal niche breadths and thermal labilities for  
347 each pair of datasets. In addition to these descriptors, we explored the congruence in the  
348 overlap of thermal niches estimated from different datasets. To do this, we examined  
349 whether interspecific thermal niche dissimilarities were correlated between the different  
350 datasets. We computed dissimilarities between the models' normalized fitted values  
351 where the temperature was the only explanatory variable using the Simpson index as  
352 previously explained, but in this case between pairs of species (see also Fig. 2). By doing  
353 so, we created a thermal niche pairwise dissimilarity matrix for each dataset. Then, we  
354 conducted Mantel tests based on Spearman's  $\rho$  correlation coefficient to assess the  
355 relationship between dissimilarity matrices obtained from the different datasets.  
356 Significance was evaluated by comparing observed  $\rho$  coefficients with 999 null values  
357 obtained by permuting the dissimilarity matrices.

358

#### 359 *Phylogenetic signal*

360 The potential lability of thermal niches shall be also assessed from an evolutionary point  
361 of view. In this sense, a marked phylogenetic signal would indicate both potential  
362 evolutionary constrains for temperature variation responses, and phylogenetically-  
363 structured effects of global warming. We reconstructed a Bayesian phylogenetic  
364 hypothesis for 18 species present in our datasets based on two mitochondrial (COI and  
365 COII) and one nuclear markers (28S RNA, see Appendix S1 for details on phylogenetic  
366 reconstruction). DNA markers were sequenced for this study and retrieved from Genbank  
367 (Table S1, accessed in June 2016). Pagel's  $\lambda$  test (Pagel, 1999) and Blomberg's K  
368 statistics (Blomberg et al. 2003) were used to explore the phylogenetic signal in the five  
369 variables considered (total and partial deviance explained by temperature, temperature  
370 optimum, thermal niche breadth, and thermal lability). , Significance for Pagel's  $\lambda$  was

371 assessed with a likelihood ratio test comparing the negative log likelihood obtained from  
372 the original tree topology with the negative log likelihood from a topology transformed to  
373 remove the signal (*i.e.*,  $\lambda = 0$ ). In the case of Blomberg's K, we tested for significance by  
374 randomizing the labels of the phylogenetic tips and comparing observed and random K  
375 values. Finally, we also investigated for phylogenetic signal in the thermal niche  
376 dissimilarities for each dataset. To do so, Spearman correlations between thermal  
377 dissimilarities and phylogenetic distances were used, assessing significance by comparing  
378 observed correlations with null values where the labels of the tips of the phylogeny were  
379 randomized. In all cases where tip labels were randomized, p-values were calculated as  
380 the proportion of null values being equal or higher than observed values.

381 All analyses were conducted in R environment (R Core Team 2020), using the  
382 *AICcmodavg* package (Mazerolle 2019) to calculate AICc values, the function "sintegral"  
383 as implemented in the *Bolstad2* package (Curran 2013) to assess areas under the curves,  
384 the *vegan* package (Oksanen et al. 2019) for the Mantel tests, and the *phytools* package  
385 (Revell 2012) to calculate Pagel's  $\lambda$  and Blomberg's K.

386

## 387 **Results**

388 There is an evident gradient in the explanatory relevance of temperature towards higher  
389 relevance at progressively larger scales (*i.e.*, geographical > seasonal > diel). Model  
390 selection revealed that the full model, including temperature and contrast variables, was  
391 the most parsimonious for most species in most datasets (Table 1). As exceptions to this  
392 general pattern, in the geographical dataset, the model only including temperature was  
393 equivalent to the full model (according to AICc) for one species, and it was also the best  
394 supported for another species. In the seasonal dataset, the model only including  
395 temperature was the best supported for four species, whereas the model only including  
396 contrast variables was equivalent to the full model for just one species. Finally, the model  
397 including minute from dawn in DD data was equivalent to the full model for only two  
398 species and even better for one species (Table 1). In general, the total deviance explained  
399 by the models including temperature and contrast variables was considerably high (mean  
400 pseudo- $R^2$ s = 0.62, 0.63, and 0.77; ranges = 0.51-0.75, 0.38-0.86, and 0.64-0.86,  
401 respectively for GD, SD, and DD; see Fig. 3). Partial regressions revealed that the effects  
402 of temperature and contrast variables largely overlap, being the deviance independently  
403 explained by temperature considerably low (see Fig. 3). Interestingly, the percentage of

404 deviance explained by temperature decreased from the geographical (mean pseudo- $R^2$ s =  
405 0.33; range 0.13–0.48), to the seasonal (0.19; 0.05–0.36) and diel datasets (0.08; 0.01–  
406 0.20) (see Fig. 3).

407 Thermal niche attributes derived from the different datasets showed little  
408 congruence. Neither the pseudo  $R^2$  explained by temperature alone nor the total pseudo  
409  $R^2$  were positively and significantly correlated between any pair of datasets, and none of  
410 the thermal niche attributes were significantly correlated between the three considered  
411 datasets (Table 2). Moreover, Mantel tests showed that interspecific niche dissimilarities  
412 were not correlated among the three studied spatiotemporal scales (Table 2). Finally, we  
413 did not find phylogenetic signal for any of these variables in any of the datasets, except in  
414 the case of niche breadth for the diel dataset (Table 3).

415

## 416 Discussion

417 Our results show that the spatial and temporal responses of the studied species show large  
418 associations to contrast variables besides temperature, but also that temperature controls  
419 to dung beetle occurrence may increase towards larger temporal and spatial scales. This  
420 contrasts with our preliminary expectations of a high importance of temperature for dung  
421 beetle occurrence and activity based on the known basal ectothermic physiology of the  
422 considered species. Further, thermal niches were incongruent across scales for the studied  
423 species and lacked phylogenetic signal, indicating that thermal adaptations are highly  
424 variable both between and within species.

425 The generally low partial effects of temperature found in our study lead to two  
426 important conclusions: (i) the abundance, distribution, and activity of dung beetles are  
427 controlled by other factors different from temperature, which are at least partially  
428 represented by the *ad hoc* contrast variables used here; and (ii) dung beetle species must  
429 have biological mechanisms that provide them with the plasticity required to cope with  
430 the temperature variations associated to each spatiotemporal context. Thermoregulation  
431 and body heat gain are intimately linked to solar radiation in ectotherms (Angilletta  
432 2009). Indeed, empirical evidence suggest that solar radiation is associated with dung  
433 beetles' body temperatures (Bartholomew & Heinrich 1978) and temporal variations in  
434 their abundance and species richness (Lobo et al. 1998). Hence, it is likely that this factor  
435 is a key environmental control of the diel activity of dung beetles. Regarding annual  
436 rhythms, photoperiod seems to be a crucial environmental cue regulating insects'  
437 seasonality (Nijhout 1994, Bradshaw & Holzapfel 2007). This is likely the case for dung

438 beetles, given the relatively weak effects of temperature on their phenology found in our  
439 study. Also, the different life-history phases of an insect need to be synchronized  
440 seasonally, and these require a minimum amount of time to complete. The development  
441 of a dung beetle individual requires from 30 to 80 days depending on the species  
442 (Christensen & Dobson 1977, Romero-Samper & Martín-Piera 1995, 2007, Arellano et  
443 al. 2017), a time that determines key life-history characteristics such as the number of  
444 generations per year or the overwintering phase. These developmental constraints are  
445 therefore hard to modify without major evolutionary changes (Teder 2020), thereby  
446 limiting the effects of environmental temperature on the seasonal abundance and  
447 occurrence of dung beetle species. Finally, many factors contribute to shaping the  
448 geographical distribution of dung beetle species, including dispersal limitations (Lobo et  
449 al. 2006), historical events (Hortal et al. 2011), or the response to other environmental  
450 variables such as precipitation, soil, habitat, or trophic preferences (Hanski et al. 1991,  
451 Hortal et al. 2001, Lobo & Martín-Piera 2002). It is important to note that we have not  
452 quantified the effects of these variables explicitly, so their inclusion could further weaken  
453 the pure effect of temperature.

454         Regardless of the effects of alternative factors, it seems accurate that dung  
455 beetles have mechanisms to withstand marked temperature variations, especially those  
456 associated with diel and seasonal rhythms. Given the nature of our data and analyses,  
457 these mechanisms can be operating either at the population level, at the individual level,  
458 or both. At the population level, a high genetic diversity linked to large phenotypic  
459 variability can produce the apparently labile thermal responses. That is, as individuals are  
460 sorted in time and/or space according to their environmental adaptations, population(s)  
461 formed by individuals with different thermal preferences would show a certain level of  
462 thermal independency. This mechanism seems more plausible to explain results in the  
463 geographical datasets, where river basins can act as dispersal barriers, limiting gene flow  
464 and enhancing local adaptation to different temperature regimens (Lenormand 2002).  
465 However, it seems less likely that this phenotypic variability alone is responsible for the  
466 responses to diel and seasonal temperature variations, where a high gene flow is expected  
467 between the individuals and populations that are active at different elevations or days.  
468 Physiologically plastic responses allowing individuals to be active at different  
469 temperatures seem a more plausible mechanism in this case (Crispo 2008). In any case,  
470 these two potential mechanisms (phenotypic variability and individual plasticity) are in  
471 agreement with the observed lack of phylogenetic signal on species responses to

472 temperature across scales, which indeed suggests a lack of thermal niche conservatism  
473 (Gilbert & Miles 2019). The relative contribution of population phenotypic variability  
474 and individual plasticity remains elusive, calling for further studies directed to unravel the  
475 detailed mechanisms behind the diverse responses to temperature found in our study.

476 Be that as it may, the effects of temperature were significant and not negligible,  
477 being larger for species distribution than for seasonal activity, and even smaller for diel  
478 activity. The increasing importance towards larger scales may be related to the fact that  
479 the effects of temperature on the studied biological aspects are nested. That is, the  
480 occurrence in a given location would entail that a species holds the adaptations required  
481 to maintain a stable population there, which include physiological and/or behavioural  
482 adaptations to cope with the seasonal temperature variations that occur in that locality. In  
483 the same way, a population with adults active during a given period of the year should  
484 present adaptations to handle the daily temperature variations happening during the days  
485 when adults are active. Hence, the hierarchically cumulative effects of temperature across  
486 these biological scales may explain why temperature becomes more important for  
487 geographic distributions than for temporal activities. Ascertaining the plausibility of this  
488 idea requires further investigation of intraspecific responses to daily temperature  
489 variations across seasons and seasonal temperature responses throughout different  
490 populations placed across the species' geographic distribution.

491 Perhaps the most interesting of our results is the lack of congruence in the  
492 realized thermal niches across the studied species and spatiotemporal contexts. This  
493 means that, for instance, species occurring in colder regions do not appear in colder  
494 months nor at colder hours of the day in other regions. This somehow counterintuitive  
495 result could be related to the uneven relevance of the alternative variables for the  
496 different species and spatiotemporal contexts, which facilitates the decoupling of the  
497 thermal responses associated with the distribution and activity of dung beetles. It is likely  
498 that the processes involved in adult movements, life-history cycles, and population  
499 maintenance are differently regulated by temperature, despite of their nested nature. In  
500 other words, our results suggest that species have multidimensional thermal niches, where  
501 each critical biological aspect responds to temperature along a different dimension.  
502 Therefore, rather than exerting a universal effect, temperature plays multiple roles in a  
503 species' biology and metapopulation dynamics. This lack of congruence, together with  
504 the low independent effects of temperature found in our deviance partition analyses,  
505 indicates that estimates of thermal niches will be, in general, inaccurate and context-

506 dependent. This calls from being particularly cautious when using responses measured at  
507 different scales as proxies for future responses to climate change. Overall, our results  
508 show the difficulties in estimating general thermal niches of species, challenging  
509 forecasts of species future dynamics under climate warming based on unidimensional  
510 thermal niches (Gvoždik, 2018).

511         The partial control of temperature on the activity and distribution of dung beetles  
512 may be both a blessing and a curse regarding the effects of climate warming. On the one  
513 hand, the apparent thermal lability suggests that temperature increases should not  
514 strongly modify neither diel and seasonal activities nor the geographic distribution of  
515 dung beetles, likely preventing mismatches with interacting species and the subsequent  
516 food chain perturbations. This assumption would contradict the results of studies  
517 suggesting moderate or even large effects of climate change on dung beetle distributions  
518 (Dortel et al. 2013, Menéndez et al. 2013, Holley & Andrew 2019). On the other hand,  
519 the diel, seasonal, or geographical adjustments are among the fastest responses to climate  
520 warming (Levy et al. 2019, Duchenne et al. 2020). However, our results suggest that the  
521 response towards temperature variations is relatively independent at each spatiotemporal  
522 scale. This entails that adjustments to temperature requirements may not be coordinated  
523 across key biological aspects. Hence, adjustments to fulfil the temperature requirements  
524 for one biological aspect may result in detrimental effects on other aspects, thereby  
525 reducing individual and population performance as, *e.g.*, seasonal adjustments may  
526 expose individuals to inadequate temperatures during diel activity. In the worst-case  
527 scenario, the incapacity of species to adjust their temperature requirements by modifying  
528 diel, seasonal, and geographical patterns at convenience will increase the likelihood of  
529 local extinctions when the individuals are exposed to critical temperatures in their daily  
530 or yearly periods of activity. Paradoxically, the partially weak effects of temperature we  
531 found may have serious consequences for climate warming if temperature regulates  
532 important aspects of species' biology in divergent ways (Tsai et al. 2020).

533         Overall, our results show that temperature may be less important than other  
534 factors in determining dung beetle activity and distribution. Further, the incongruences in  
535 thermal niches estimated from the geographic distribution and seasonal and diel activities  
536 show the complex effects of temperature on key species aspects, pointing to a truly  
537 multidimensional nature of thermal niches. Together with the partially weak control of  
538 temperature on species activity and distribution, these incongruences may difficult fast



539 responses to climate warming, potentially exposing individuals to critical, or at least  
540 inadequate, temperatures and reducing individual and population's fitness.

541

## 542 **References**

543 Angilletta, M.J., 2009. *Thermal adaptation: a theoretical and empirical synthesis*. Oxford  
544 University Press, Oxford, UK.

545 Araújo, M.B., Nogués-Bravo, D., Diniz-Filho, J.A.F., Haywood, A.M., Valdes, P.J. &  
546 Rahbek, C. 2008. Quaternary climate changes explain diversity among reptiles  
547 and amphibians. *Ecography* 31, 8-15.

548 Arellano, L., Castillo-Guevara, C., Huerta, C., Gemán-García, A. & Lara, C. 2017.  
549 Nesting biology and life history of the dung beetle *Onthophagus leontei*  
550 (Coleoptera: Scarabaeinae). *Animal Biology* 67, 41-52.

551 Bartholomew, G.A. & Heinrich, B. 1978. Endothermy in African dung beetles during  
552 flight, ball making, and ball rolling. *Journal of Experimental Biology* 73, 65-83.

553 Blasco-Moreno, A., Pérez-Casany, M., Puig, P., Morante, M. & Castells, E. 2019. What  
554 does a zero mean? Understanding false, random and structural zeros in ecology.  
555 *Methods in Ecology and Evolution* 10, 949-959.

556 Blomberg, S.P., Garland Jr., T. & Ives A.R. 2003. Testing for phylogenetic signal in  
557 comparative data: behavioral traits are more labile. *Evolution* 57: 717-745.

558 Bradshaw, W.E. & Holzapfel, C.M. 2007. Evolution of animal photoperiodism. *Annual*  
559 *Review in Ecology, Evolution and Systematic* 38, 1-25.

560 Bradshaw, W.E. & Holzapfel, C.M. 2010. Light, time, and the physiology of biotic  
561 response to rapid climate change in animals. *Annual Review of Physiology* 72,  
562 147-166.

563 Brown, J.H., Gillooly, J.F., Allen, A.P., Savage, V.M & West, G.B. 2004. Toward a  
564 metabolic theory of ecology. *Ecology* 85, 1771-1789.

565 Calatayud, J., Hortal, J., Medina, N.G., Turin, H., Bernard, R., Casale, A., Vicente M.,  
566 O., Lyubomir, P. & Rodríguez, M.Á. 2016. Glaciations, deciduous forests, water  
567 availability and current geographical patterns in the diversity of European  
568 *Carabus* species. *Journal of Biogeography* 43, 2343-2353.

569 Calatayud, J., Rodríguez, M.Á., Molina-Venegas, R., Leo, M., Horreo, J.L., & Hortal, J.  
570 2019. Pleistocene climate change and the formation of regional species pools.  
571 *Proceedings of the Royal Society B* 286, 20190291.

- 572 Chapin III, F.S. & Díaz, S. 2020. Interactions between changing climate and biodiversity:  
573 Shaping humanity's future. *Proceedings of the National Academy of Science*  
574 U.S.A. 117, 6295-6296
- 575 Crispo, E. 2008. Modifying effects of phenotypic plasticity on interactions among natural  
576 selection, adaptation and gene flow. *Journal of Evolutionary Biology* 21, 1460-  
577 1469.
- 578 Christensen, C.M. & Dobson, R.C. 1977. Biological studies on *Aphodius fimetarius* (L.)  
579 (Coleoptera, Scarabaeidae). *Journal of Kansas Entomological Society* 50, 129-  
580 134.
- 581 Cuesta, E. & Lobo, J.M. 2019. A comparison of dung beetle assemblages (Coleoptera,  
582 Scarabaeoidea) collected 34 years apart in an Iberian mountain locality. *Journal*  
583 *of Insect Conservation* 23, 101-110.
- 584 Curran, J.M. 2013. Bolstad2: Bolstad functions. R package version 1.0-28.  
585 <https://CRAN.R-project.org/package=Bolstad2>
- 586 Dortel, E., Thuiller W., Lobo J.M., Bohbot H., Jay-Robert P. & Lumaret J.P. 2013.  
587 Potential effects of climate change on the distribution of Scarabaeidae dung  
588 beetles in Western Europe. *Journal of Insect Conservation* 17, 1059-1070.
- 589 Duchenne, F., Thébault, E., Michez, D., Elias, M., Drake, M., Persson, M., Piot, J.S.,  
590 Pollet, M., Vanormelingen, P. & Fontaine, C. 2020. Phenological shifts alter the  
591 seasonal structure of pollinator assemblages in Europe. *Nature Ecology &*  
592 *Evolution* 4: 115-121.
- 593 Edwards, M. & Richardson, A.J. 2004. Impact of climate change on marine pelagic  
594 phenology and trophic mismatch. *Nature*, 430, 881-884.
- 595 Espinoza, V.R. 2016. Distribución y estructura de las comunidades de escarabeidos  
596 coprófagos (Coleoptera, Scarabaeoidea) a lo largo de gradientes de  
597 altitud. Unpublished PhD thesis available at <https://eprints.ucm.es/36438/>
- 598 Gilbert, A.L. & Miles, D. B. 2019. Spatiotemporal variation in thermal niches suggests  
599 lability rather than conservatism of thermal physiology along an environmental  
600 gradient. *Biological Journal of the Linnean Society* 128, 263-277.
- 601 Guo, F., Guénerad, B., Economo, E.P., Deutsch, C.A. & Bonebrake, T.C. 2020. Activity  
602 niches outperform thermal physiological limits in predicting global ant  
603 distributions. *Journal of Biogeography* 47, 829-842.
- 604 Gouveia, S.F., Hortal, J., Tejedo, M., Duarte, H., Cassemiro, F.A.S., Navas, C.A. &  
605 Diniz-Filho, J.A.F. 2014. Climatic niche at physiological and macroecological

- 606 scales: the thermal tolerance–geographical range interface and niche  
607 dimensionality. *Global Ecology and Biogeography* 23, 446-456
- 608 Gvoždik, L. 2018. Just what is the thermal niche? *Oikos* 127, 1701-1710.
- 609 Hanski, I. & Cambefort, Y. 1991. Resource partitioning. In: *Dung Beetle Ecology*.  
610 Hanski, I. & Cambefort, Y (eds.) Princeton University Press, Princeton, NJ. Pp.  
611 330-349.
- 612 Hijmans, R.J., Cameron, S.E., Parra, J.L., Jones, P.G. & Jarvis, A. 2005. Very high  
613 resolution interpolated climate surfaces for global land areas. *International*  
614 *Journal of Climatology* 25, 1965-1978.
- 615 Holley, J.M. & Andrew, N.R. 2019. Experimental warming alters the relative survival  
616 and emigration of two dung beetle species from an Australian dung pat  
617 community. *Austral Ecology* 44, 800-811.
- 618 Hortal, J., Lobo, J.M. & Martín-Piera, F. 2001. Forecasting insect species richness scores  
619 in poorly surveyed territories: the case of the Portuguese dung beetles (Col.  
620 Scarabaeinae). *Biodiversity and Conservation* 10, 1343-1367.  
621 doi:10.1023/A:1016624500023
- 622 Hortal, J. & Lobo, J.M. 2011. Can species richness patterns be interpolated from a limited  
623 number of well-known areas? Mapping diversity using GLM and kriging.  
624 *Natureza & Conservação* 9, 200-207.
- 625 Huey, R.B. & Kingsolver, J.G. 1989. Evolution of thermal sensitivity of ectotherm  
626 performance. *Trend in Ecology and Evolution* 4, 131-135.
- 627 Legendre, P. 1993. Spatial autocorrelation: trouble or new paradigm? *Ecology* 74, 1659-  
628 1673 doi: 10.2307/1939924
- 629 Lehner, B. & Grill, G. 2013. Global river hydrography and network routing: baseline data  
630 and new approaches to study the world's large river systems. *Hydrological*  
631 *Processes* 27, 2171-2186.
- 632 Lenormand, T. 2002. Gene flow and the limits to natural selection. *Trends in Ecology &*  
633 *Evolution* 17, 183-189.
- 634 Levy, O., Dayan, T., Porter, W.P. & Kronfeld-Schor, N. 2019. Time and ecological  
635 resilience: can diurnal animals compensate for climate change by shifting to  
636 nocturnal activity? *Ecological Monographs* 89, e01334.
- 637 Lobo, J.M., Lumaret, J.P. & Jay-Robert, P. 1998. Sampling dung beetles in the French  
638 Mediterranean area: Effects of abiotic factors and farm practices. *Pedobiologia*  
639 42, 252-266.

- 640 Lobo, J.M. & Martín-Piera, F. 2002. Searching for a predictive model for species richness  
641 of Iberian dung beetle based on spatial and environmental variables. *Conservation*  
642 *Biology* 16, 158-173.
- 643 Lobo, J.M., Verdú, J.R. & Numa, C. 2006. Environmental and geographical factors  
644 affecting the Iberian distribution of flightless *Jekelius* species (Coleoptera:  
645 Geotrupidae). *Diversity and Distributions* 12, 179-188.
- 646 Lobo, J.M., Hortal, J., Yela, J.L., Millán, A., Sánchez-Fernández, D., García-Roselló, E.,  
647 González-Dacosta, J., Heine, J., González-Vilas, L. & Guisande, C. 2018.  
648 KnowBR: An application to map the geographical variation of survey effort and  
649 identify well-surveyed areas from biodiversity databases. *Ecological Indicators*  
650 91, 241-248.
- 651 Löffler, J. & Pape, R. 2020. Thermal niche predictors of alpine plant species. *Ecology*  
652 101, e02891.
- 653 Madrigal-González, J., Andivia, E., Zavala, M.A., Stoffel, M., Calatayud, J., Sánchez-  
654 Salguero, R. & Ballesteros-Cánovas, J. 2018. Disentangling the relative role of  
655 climate change on tree growth in an extreme Mediterranean environment. *Science*  
656 *of the Total Environment* 642, 619-628.
- 657 Mazerolle, M.J. 2019. AICcmodavg: Model selection and multimodel inference based on  
658 (Q)AIC(c). R package version 2.2-2. [https://cran.r-](https://cran.r-project.org/package=AICcmodavg)  
659 [project.org/package=AICcmodavg](https://cran.r-project.org/package=AICcmodavg).
- 660 Mayhew, P.J., Jenkins, G.B. & Benton, T.G. 2008. A long-term association between  
661 global temperature and biodiversity, origination and extinction in the fossil  
662 record. *Proceedings of the Royal Society B* 275, 47-53.
- 663 Menéndez, R., González-Megías, A., Jay-Robert, P. & Marquéz-Ferrando, R. 2014.  
664 Climate change and elevational range shifts of dung beetles. *Global Ecology and*  
665 *Biogeography* 23, 646-657. doi:10.1111/geb.12142.
- 666 Milotić, T., et al. 2019. Functionally richer communities improve ecosystem functioning:  
667 Dung removal and secondary seed dispersal by dung beetles in the Western  
668 Palearctic. *Journal of Biogeography* 46, 70-82.
- 669 Nervo, B., et al. 2017. Ecological functions provided by dung beetles are interlinked  
670 across space and time: evidence from 15N isotope tracing. *Ecology* 98, 433-446.
- 671 Nijhout, H.F. 1994. *Insect Hormones*. Princeton, NJ: Princeton University Press
- 672 Oksanen, J., Blanchet, F. G., Friendly, M., Kindt, R., Legendre, P., McGlinn, D.,  
673 Minchin, P.R., O'Hara, R.B., Simpson, G.L., Solymos, P., Stevens, M.H.H.,

- 674 Szoecs, E. & Wagner H. 2019. vegan: Community Ecology Package. R package  
675 version 2.5-6. <https://CRAN.R-project.org/package=vegan>
- 676 Paaijmans, K.P., Heining, R.L., Seliga, R.A., Blanford, J.I., Blanford, S., Murdock, C.C.  
677 & Thomas, M.B. 2013. Temperature variation makes ectotherms more sensitive to  
678 climate change. *Global Change Biology* 19, 2373-2380.
- 679 Pagel, M. 1999. Inferring the historical patterns of biological evolution. *Nature* 401, 877-  
680 884.
- 681 R Core Team 2020. R: A language and environment for statistical computing. R  
682 Foundation for Statistical Computing, Vienna, Austria. URL [https://www.R-](https://www.R-project.org/)  
683 [project.org/](https://www.R-project.org/).
- 684 Rader, R., Reilly, J., Bartomeus, I. & Winfree, R. 2013. Native bees buffer the negative  
685 impact of climate warming on honey bee pollination of watermelon crops. *Global*  
686 *Change Biology* 19, 3103-3110.
- 687 Revell, L.J. 2012. phytools: An R package for phylogenetic comparative biology (and  
688 other things). *Methods in Ecology and Evolution* 3, 217-223.
- 689 Román-Palacios, C. & Wiens, J. 2020. Recent responses to climate change reveal the  
690 drivers of species extinction and survival. *Proceedings of the National Academy*  
691 *of Science U.S.A.* 117, 4211-4217.
- 692 Romero-Samper, J. & Martín-Piera, F. 1995. Nesting behaviour, ontogeny and life –cycle  
693 of *Onthophagus stylocerus* (Coleoptera; Scarabaeidae). *European Journal of*  
694 *Entomology* 92, 667-679.
- 695 Romero-Samper, J. & Martín-Piera, F. 2007. Comportamiento reproductor y ciclo  
696 biológico de *Aphodius conjugatus* (Panzer, 1795) (Coleoptera, Aphodiidae).  
697 *Boletín Sociedad Entomológica Aragonesa* 41, 189-192.
- 698 Sánchez-Fernández, D., Aragón, P., Bilton, D.T. & Lobo, J.M. 2012. Assessing the  
699 congruence of thermal niche estimations derived from distribution and  
700 physiological data. A test using diving beetles. *PLoS ONE* 7, e48163.
- 701 Saunders, D.S. 2020. Dormancy, diapause, and the role of the circadian system in Insect  
702 photoperiodism. *Annual Review of Entomology* 5, 373-389.
- 703 Saupe, E.E., Barve, N., Owens, H.L., Cooper, J.C., Hosner, P.A. & Peterson, A.T. 2018.  
704 Reconstructing Ecological Niche Evolution When Niches Are Incompletely  
705 Characterized. *Systematic Biology* 67, 428-438
- 706 Schwartzman, D. 1999. *Life, Temperature, and the Earth*. Columbia University Press,  
707 New York.

- 708 Schweiger, O., Settele, J., Kudrna, O., Klotz, S., & Kühn, I. 2008. Climate change can  
709 cause spatial mismatch of trophically interacting species. *Ecology* 89, 3472-3479.
- 710 Scranton, K. & Amarasekare, P. 2017. Predicting phenological shifts in a changing  
711 climate. *Proceedings of the National Academy of Sciences* 114, 13212-13217.
- 712 Sheldon, K.S., Yang, S. & Tewksbury, J.J. 2011. Climate change and community  
713 disassembly: impacts of warming on tropical and temperate montane community  
714 structure. *Ecology Letters* 14, 1191-1200.
- 715 Somero, G. 2005. Linking biogeography to physiology: Evolutionary and acclimatory  
716 adjustments of thermal limits. *Frontiers in Zoology*, 2: 1-9.
- 717 Sunday, J., Bennett, J.M., Calosi, P., Clusella-Trullas, S., Gravel, S., Hargreaves, A.L.,  
718 Leiva, F.P., Verberk, W.C.E.P., Olalla-Tárraga, M.A. & Morales-Castilla, I. 2019.  
719 Thermal tolerance patterns across latitude and elevation. *Philosophical*  
720 *Transactions of the Royal Society B* 374, 20190036.
- 721 Tsai, H. Y., et al. 2020. Locally-adapted reproductive photoperiodism determines  
722 population vulnerability to climate change in burying beetles. *Nature*  
723 *communications* 11, 1-12.
- 724 Teder, T. 2020. Phenological responses to climate warming in temperate moths and  
725 butterflies: species traits predict future changes in voltinism. *Oikos* 129, 1051-  
726 1060.
- 727 Thackeray, S.J. et al. 2016. Phenological sensitivity to climate across taxa and trophic  
728 levels. *Nature* 535, 241-245.
- 729 Verdú, J.R., Arellano, J. & Numa, C. 2006. Thermoregulation in endothermic dung  
730 beetles (Coleoptera: Scarabaeidae): Effect of body size and ecophysiological  
731 constraints in flight. *Journal of Insect Physiology* 52, 854-860.
- 732 Verdú, J.R. & Lobo, J.M. 2008. Ecophysiology of thermoregulation in endothermic dung  
733 beetles: ecological and geographical implications. In Fattorini, S (ed). *Insect*  
734 *Ecology and Conservation*. Research Singpost, Trivandrum, Kerala, pp. 299-317.
- 735 Verdú, J.R., Alba-Tercedor, J. & Jimenez-Manrique, M. 2012. Evidence of different  
736 thermoregulatory mechanisms between two sympatric *Scarabaeus* species using  
737 infrared thermography and micro-computer tomography. *PLoS ONE* 7, e33914
- 738 Villén-Pérez, S. & Carrascal, L.M. 2015. Occurrence data may provide unreliable thermal  
739 preferences and breadth of species. *Current Zoology* 61, 972-982.

740 Wang, Z., Brown, J.H., Tang, Z. & Fang, J. 2009. Temperature dependence, spatial scale,  
741 and tree species diversity in eastern Asia and North America. *Proceedings of the*  
742 *National Academy of Sciences* 106, 13388-13392.

**Table 1.** AICc values for the models of each species in each dataset. In all cases, we conducted a complete model (Full) including temperature and the corresponding contrast variables, a model only including temperature (Temp), a model only including contrast variables (Cont), and a null model where no predictor variable was included (Null). Contrast variables were minutes from dawn and its quadratic term for the diel data set; date sine and cosine and their quadratic terms for the seasonal dataset; and temperature availability for the geographic data set. The best models in terms of AICc and the equivalent ones ( $\Delta AICc < 2$ ) are highlighted in bold.

| Subfamily    | Species                                          | Diel          |        |               |        | Seasonal      |               |               |        | Geographic    |               |        |        |
|--------------|--------------------------------------------------|---------------|--------|---------------|--------|---------------|---------------|---------------|--------|---------------|---------------|--------|--------|
|              |                                                  | Full          | Temp   | Cont          | Null   | Full          | Temp          | Cont          | Null   | Full          | Temp          | Cont   | Null   |
| Aphodiinae   | <i>Acrossus depressus</i> (Kugelann, 1792)       | <b>176.53</b> | 245.53 | 187.59        | 264.43 | <b>120.25</b> | 126.26        | <b>120.67</b> | 149.35 | <b>172.98</b> | <b>173.17</b> | 209.50 | 209.95 |
| Aphodiinae   | <i>Agrilinus constans</i> (Duftschmid, 1805)     | <b>140.21</b> | 197.94 | 145.50        | 214.29 | <b>200.92</b> | 210.56        | 206.92        | 216.62 | <b>211.85</b> | 218.76        | 269.52 | 289.54 |
| Aphodiinae   | <i>Aphodius fimetarius</i> (Linnaeus, 1758)      | <b>116.91</b> | 162.51 | 121.10        | 177.61 | 201.68        | <b>199.58</b> | 217.13        | 214.00 | <b>380.68</b> | 404.55        | 419.41 | 455.12 |
| Aphodiinae   | <i>Aphodius foetidus</i> (Herbst, 1783)          | <b>42.72</b>  | 56.56  | <b>44.51</b>  | 64.09  | 138.39        | <b>133.18</b> | 146.06        | 144.19 | <b>634.53</b> | 679.39        | 753.81 | 861.04 |
| Aphodiinae   | <i>Colobopterus erraticus</i> (Linnaeus, 1758)   | <b>128.81</b> | 150.10 | 136.82        | 164.96 | <b>208.49</b> | 251.21        | 217.59        | 272.82 | <b>343.34</b> | 366.05        | 372.06 | 410.67 |
| Aphodiinae   | <i>Esymus pusillus</i> (Herbst, 1789)            | 175.62        | 227.70 | <b>171.67</b> | 241.45 | <b>151.68</b> | 163.52        | 217.18        | 191.76 | <b>147.93</b> | 153.05        | 177.47 | 180.48 |
| Aphodiinae   | <i>Melinopterus sphaelatus</i> (Panzer, 1798)    | <b>471.34</b> | 534.10 | 493.63        | 577.91 | <b>307.12</b> | 322.42        | 321.94        | 343.35 | <b>289.63</b> | 304.26        | 354.89 | 390.33 |
| Aphodiinae   | <i>Teuchestes fossor</i> (Linnaeus, 1758)        | <b>194.71</b> | 256.95 | 208.75        | 280.58 | <b>89.06</b>  | 98.58         | 96.18         | 116.19 | <b>258.00</b> | 268.42        | 304.76 | 318.01 |
| Aphodiinae   | <i>Trichonotulus scrofa</i> (Fabricius, 1787)    | <b>144.87</b> | 185.24 | 160.35        | 207.64 | <b>204.82</b> | 226.12        | 216.37        | 261.94 | <b>182.51</b> | 186.38        | 221.98 | 242.86 |
| Aphodiinae   | <i>Volinus sticticus</i> (Panzer, 1798)          | <b>305.09</b> | 342.35 | 310.59        | 371.12 | <b>116.05</b> | 407.35        | 121.57        | 122.05 | <b>133.88</b> | <b>132.11</b> | 167.53 | 169.92 |
| Scarabaeinae | <i>Euroniticellus fulvus</i> (Goeze, 1777)       | <b>39.24</b>  | 59.86  | 49.17         | 67.31  | <b>446.74</b> | 473.23        | 454.04        | 519.71 | <b>285.43</b> | 306.31        | 306.07 | 352.08 |
| Scarabaeinae | <i>Onthophagus fracticornis</i> (Preysler, 1790) | <b>255.26</b> | 325.6  | 266.11        | 350.04 | 188.32        | <b>184.52</b> | 200.87        | 201.75 | <b>274.14</b> | 279.86        | 317.51 | 329.60 |
| Scarabaeinae | <i>Onthophagus lemur</i> (Fabricius, 1781)       | <b>117.11</b> | 153.81 | 124.15        | 170.30 | 200.57        | <b>158.52</b> | 205.75        | 174.36 | <b>231.64</b> | 238.74        | 290.70 | 313.01 |
| Scarabaeinae | <i>Onthophagus opacicollis</i> Reitter, 1892     | <b>71.03</b>  | 80.84  | 76.13         | 90.69  | <b>343.31</b> | 355.11        | 350.70        | 356.49 | <b>207.58</b> | 215.60        | 218.29 | 251.59 |
| Scarabaeinae | <i>Onthophagus similis</i> (Scriba, 1790)        | <b>256.91</b> | 342.23 | 260.48        | 359.42 | <b>612.48</b> | 617.79        | 646.30        | 658.81 | <b>312.48</b> | 328.99        | 363.43 | 400.08 |
| Scarabaeinae | <i>Onthophagus vacca</i> (Linnaeus, 1767)        | <b>248.03</b> | 300.37 | <b>248.30</b> | 318.63 | <b>285.06</b> | 296.59        | 299.48        | 318.99 | <b>315.14</b> | 337.44        | 352.21 | 409.05 |



**Table 2.** Spearman's  $\rho$  correlation coefficients and P-values between the considered thermal niche attributes measured by the three studied datasets are detailed.. DD: Diel dataset. SD: Seasonal dataset. GD: Geographical dataset. \* Results based on Mantel test.

|                                     | DD vs SD |          | DD vs GD |          | SD vs GD |          |
|-------------------------------------|----------|----------|----------|----------|----------|----------|
|                                     | $\rho$   | <i>P</i> | $\rho$   | <i>P</i> | $\rho$   | <i>P</i> |
| <b>Breadth</b>                      | -0.074   | 0.788    | -0.385   | 0.141    | 0.100    | 0.713    |
| <b>Optimum</b>                      | -0.262   | 0.326    | -0.179   | 0.505    | 0.394    | 0.132    |
| <b>Thermal lability</b>             | -0.261   | 0.347    | -0.339   | 0.216    | 0.132    | 0.625    |
| <b>Total pseudo R<sup>2</sup></b>   | 0.029    | 0.914    | -0.016   | 0.953    | -0.200   | 0.456    |
| <b>Partial pseudo R<sup>2</sup></b> | -0.561   | 0.024    | -0.440   | 0.088    | 0.053    | 0.848    |
| <b>Niche dissimilarity *</b>        | 0.260    | 0.056    | 0.242    | 0.051    | 0.120    | 0.153    |

**Table 3.** Phylogenetic signal in thermal niches attributes for the three studied datasets (*i.e.*, geographical, seasonal and diel). Significant variables are highlighted in bold. \* Results based on Mantel test.

| Variable                            | Dataset      | K            | P            | $\lambda$    | P            | $\rho$ | P     |
|-------------------------------------|--------------|--------------|--------------|--------------|--------------|--------|-------|
| <b>Breadth</b>                      | Geographical | 0.480        | 0.150        | 0            | 1            | -      | -     |
|                                     | Seasonal     | 0.285        | 0.798        | 0            | 1            | -      | -     |
|                                     | <b>Diel</b>  | <b>0.998</b> | <b>0.001</b> | <b>1.096</b> | <b>0.002</b> | -      | -     |
| <b>Optimum</b>                      | Geographical | 0.292        | 0.811        | 0.002        | 0.990        | -      | -     |
|                                     | Seasonal     | 0.477        | 0.188        | 0.361        | 0.160        | -      | -     |
|                                     | Diel         | 0.292        | 0.710        | 0            | 1            | -      | -     |
| <b>Thermal lability</b>             | Geographical | 0.475        | 0.171        | 0            | 1            | -      | -     |
|                                     | Seasonal     | 0.295        | 0.900        | 0            | 1            | -      | -     |
|                                     | Diel         | 0.467        | 0.228        | 0.007        | 0.970        | -      | -     |
| <b>Total pseudo R<sup>2</sup></b>   | Geographical | 0.287        | 0.857        | 0            | 1            | -      | -     |
|                                     | Seasonal     | 0.324        | 0.710        | 0            | 1            | -      | -     |
|                                     | Diel         | 0.313        | 0.726        | 0            | 1            | -      | -     |
| <b>Partial pseudo R<sup>2</sup></b> | Geographical | 0.367        | 0.476        | 0            | 1            | -      | -     |
|                                     | Seasonal     | 0.388        | 0.398        | 0            | 1            | -      | -     |
|                                     | Diel         | 0.425        | 0.350        | 0            | 1            | -      | -     |
| <b>Niche dissimilarity *</b>        | Geographical | -            | -            | -            | -            | -0.100 | 0.089 |
|                                     | Seasonal     | -            | -            | -            | -            | 0.200  | 0.980 |
|                                     | Diel         | -            | -            | -            | -            | -0.080 | 0.139 |

**Figure 1.** a) The areas of study for the geographical, seasonal and diel datasets (from left to right). Red squares show the position of the following down-scaled study site. b) Temperature variations in study sites. Lines correspond with predictions of general additive models (GAM) of: (i) temperature availability (measured as the number of 10 km<sup>2</sup> grid cells whose temperature fell within predefined temperature bins) as function of temperature for the geographic dataset (left); (ii) temperature as a function of days from New Year and minutes from dawn for the seasonal and diel datasets respectively. Analyses were computed independently for each basin, for each elevational site and for each day. GAMs explained an average of 0.90 of deviance across all analyses (median = 0.92, ranging from 0.79 to 0.97).

**a) Study site**

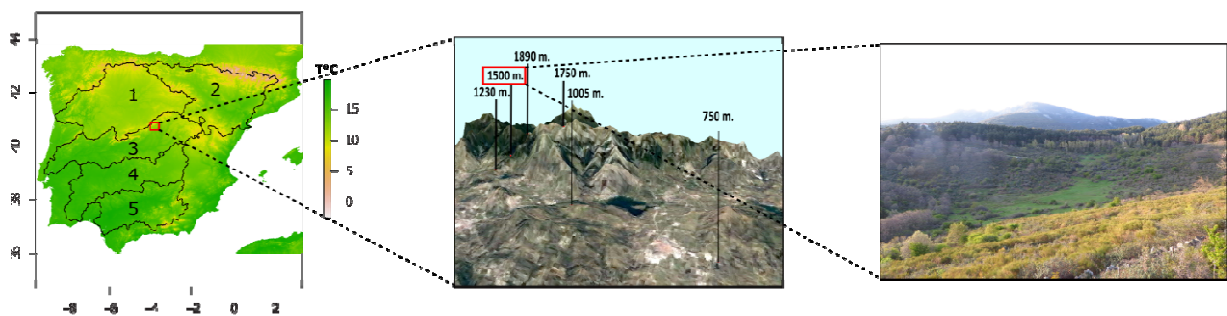

**b) Temperature variations**

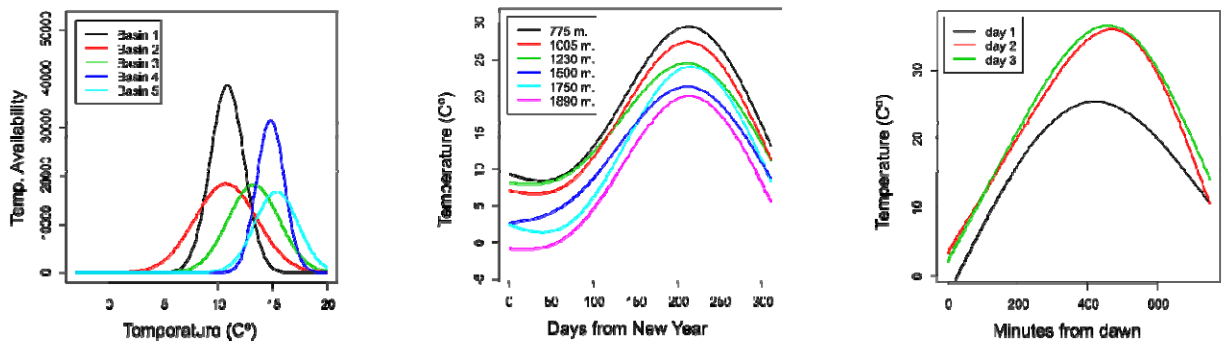

**Figure 2. Thermal niche attributes and overlap measure.**  $x$  and  $y$  represent thermal response curves of two species or of a single species in two different study units (*i.e.*, days, elevation or river basins). From this curve we obtained the optimum temperature and the niche amplitude. Further, we used the overlap between them (a) and the two independent areas (b and c) to calculate the Simpson's dissimilarity index, as a measure of the congruence between the responses to temperature of the same species at different scales, and of different species within the same scale.

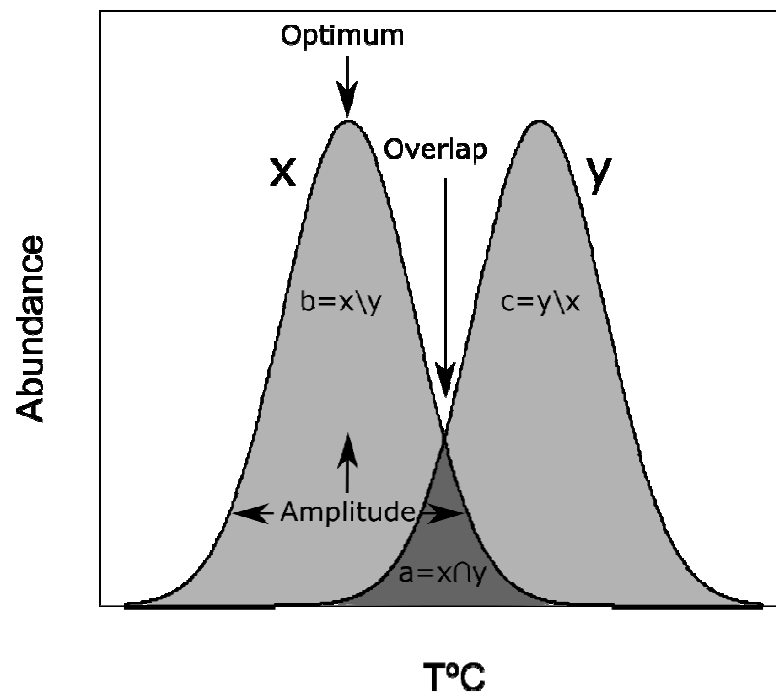

**Figure 3. Partial regression results.** The deviance explained by temperature alone, the contrast variables alone, and the overlap between them is shown. The contrast variables were minutes from dawn and its quadratic term for the diel data set (a); date sine and cosine and their quadratic terms for the seasonal data set (b), and temperature availability for the geographic data set (c).

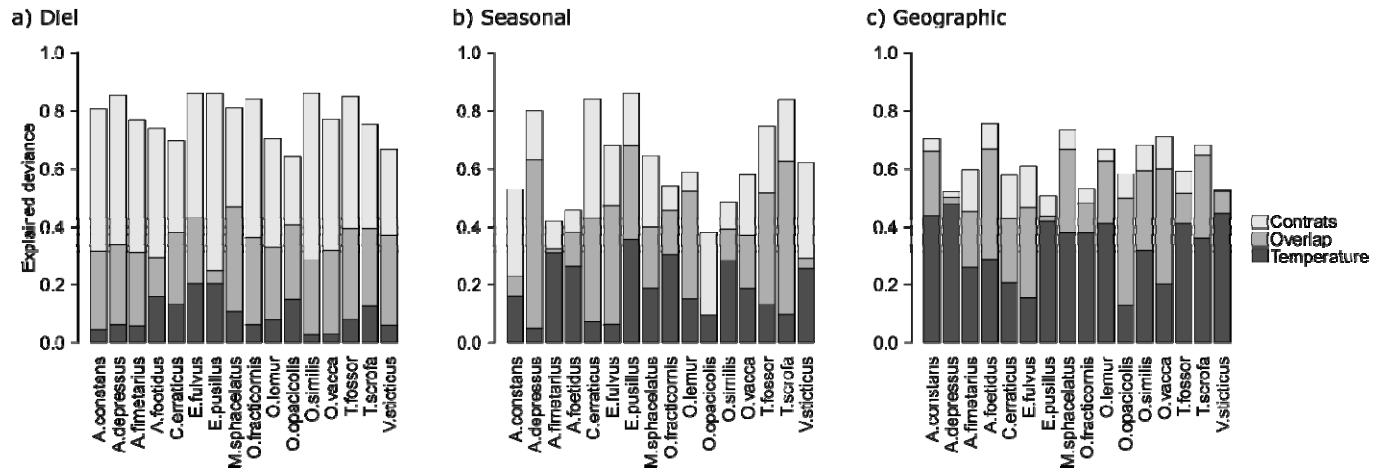

## Supporting information

### Appendix S1

Genomic DNA was extracted from each individual using the BIOSPRINT 15 DNA Kit (Qiagen), following standard manufacturer's protocols for blood, and resuspended in 100  $\mu$ l of buffer AE. We used COI Sca F, COI Sca R, COII am Sca and COII B 605 Sea (Villalba et al. 2002) and the universal 28S a y 28S 5b primers to amplify fragments of the mitochondrial cytochrome oxidase I (COI), the cytochrome oxidase II (COII) and the 28S genes. Amplifications for all gene fragments were performed in a 50  $\mu$ l reaction containing 39.7  $\mu$ l of H<sub>2</sub>O, 5  $\mu$ l of 10x PCR buffer, 1  $\mu$ l of dNTP mix (10 mM), 0.5  $\mu$ l of each primer (10  $\mu$ M), 0.3  $\mu$ l of AmpliTaq® DNA polymerase (Applied Biosystems) and 3  $\mu$ l of DNA template. Thermocycling conditions consisted of an initial denaturing step at 94 °C for 4 min, followed by two cycles: (i) a precycle of 5 amplification cycles of 94 °C for 45 sec, 40 °C for 1 min and 72 °C for 1 min, and (ii) a cycle of 35 amplification cycles of 94 °C for 45 sec, 44 °C for 1 min and 72 °C for 1 min, followed by a final elongation step at 72 °C for 10 min and a rapid thermal ramp down to 4 °C. For all reactions, the presence of amplicons of the expected sizes was checked by electrophoresis on a 0.8 % agarose gel. PCR products were purified with the ethanol-precipitation method (Sambrook et al., 1989). Sequencing was performed by Secugen S.L. (Madrid, Spain), using BigDye® and the automated ABI PRISM 3730xl DNA Analyzer. Sequence chromatograms were read and contigs assembled using Sequencher version 4.7 (Gene Codes Corporation, Ann Arbor, MI). All new sequences were deposited in GenBank (see accession numbers in Table S1).

Sequences were aligned in CLUSTALW and MUSCLE, followed by visual inspection using BioEdit (Hall, 1999). Prior to phylogenetic analysis, jModeltest 2.1.1 (Darriba et al., 2012) was used to choose the best-fit model of nucleotide substitution for each of the four genes, and for combined matrices under the corrected Akaike information criterion (AICc). For the COI and COII, HKY was obtained, while Jukes Cantor for 28S. Phylogenetic analyses were performed in a Bayesian framework using BEAST v 2.4 (Drummond and Rambaut, 2007). We established 3 calibrations points based on Ahrens et. al (2014), setting uniform priors with lower and upper boundaries. The calibrations represent the basal split of the following taxa: Aphodiinae (58.7 – 55.8 Million years ago), *Aphodius* (37.2 – 33.9 Mya) and Scarabaeinae (92 – 83.5 Mya). For the age of the rest of the nodes, we set a LogNormal relaxed molecular clock for each

gene and let the software estimate the rate from the priors. The MCMC chain ran for 100.000.000 steps, sampled every 10.000 steps. Posterior distribution of all the parameters were checked using Tracer, as well as all ESS values being above 200. We built the tree using Tree Annotator, using the Maximum Clade Credibility implemented method after discarding the first 25% samples as a burn-in.

## References

- Ahrens, D., Schwarzer, J., & Vogler, A. P. 2014. The evolution of scarab beetles tracks the sequential rise of angiosperms and mammals. *Proceedings of the Royal Society B: Biological Sciences* 281, 20141470
- Bouckaert, R., et al. 2014. BEAST 2: a software platform for Bayesian evolutionary analysis. *PLoS Computational Biology* 10, e1003537.
- Darriba, D., Taboada, G. L., Doallo, R., & Posada, D. 2012. jModelTest 2: more models, new heuristics and parallel computing. *Nature methods* 9, 772-772.
- Hall, T.A. 1999. BioEdit: A User-Friendly Biological Sequence Alignment Editor and Analysis Program for Windows 95/98/NT. *Nucleic Acids Symposium Series* 41, 95-98.
- Sambrook, J., Fritsch, E. F., & Maniatis, T. 1989. *Molecular cloning: a laboratory manual*, 2nd ed. Cold Spring Harbor, New York: Cold Spring Harbor Laboratory Press
- Villalba, S., Lobo, J. M., Martín-Piera, F., & Zardoya, R. 2002. Phylogenetic relationships of Iberian dung beetles (Coleoptera: Scarabaeinae): insights on the evolution of nesting behavior. *Journal of molecular evolution* 55, 116-126.

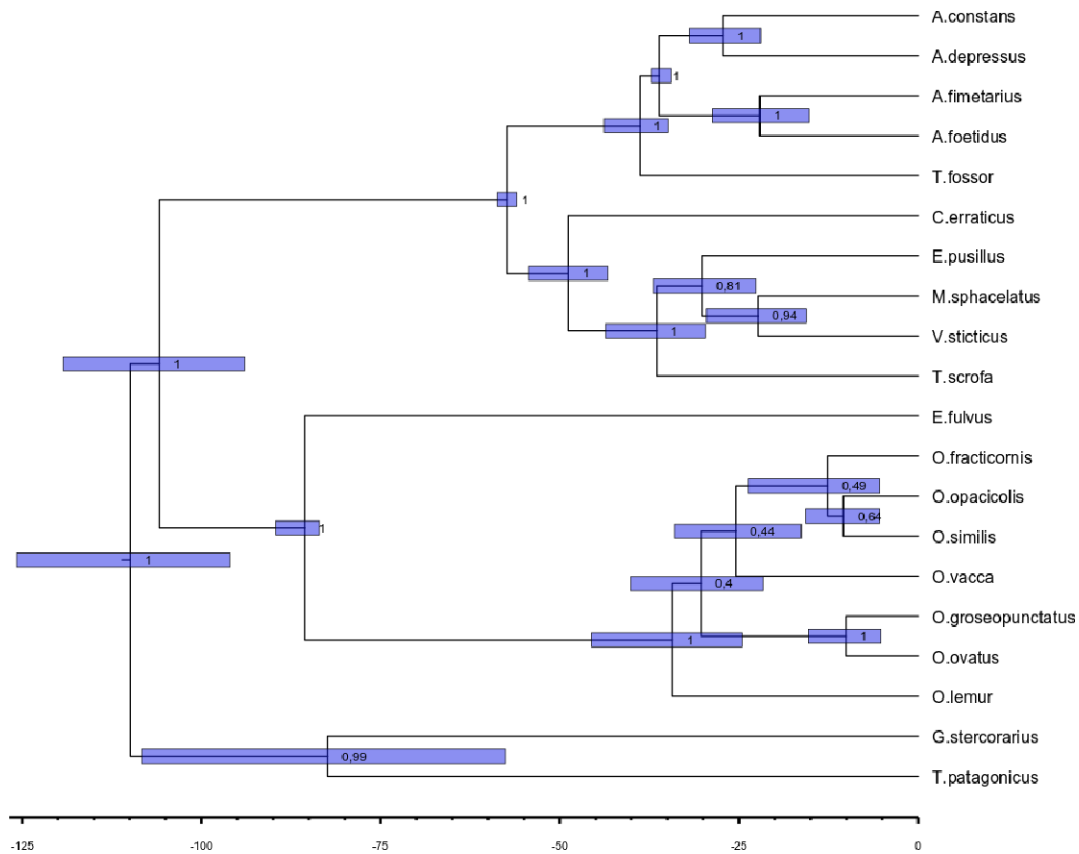

**Fig. S1.** Bayesian phylogenetic hypothesis for the studied species. Posterior probabilities are provided. Blue bars represent the 95% credible interval around node ages.



| <b>Species</b>                         | <b>28</b> | <b>COI</b> | <b>COII</b> |
|----------------------------------------|-----------|------------|-------------|
| <i>Aphodius constans</i>               | -         | AY039372   | AY039372    |
| <i>Aphodius depressus</i>              | ABXXXX    | ABXXXX     | ABXXXX      |
| <i>Aphodius erraticus</i>              | ABXXXX    | ABXXXX     | ABXXXX      |
| <i>Aphodius fimetarius</i>             | ABXXXX    | ABXXXX     | ABXXXX      |
| <i>Aphodius foetidus</i>               | -         | ABXXXX     | ABXXXX      |
| <i>Aphodius fossor</i>                 | ABXXXX    | ABXXXX     | ABXXXX      |
| <i>Aphodius pusillus</i>               | ABXXXX    | ABXXXX     | ABXXXX      |
| <i>Aphodius scrofa</i>                 | ABXXXX    | ABXXXX     | ABXXXX      |
| <i>Aphodius sphacelatus</i>            | ABXXXX    | ABXXXX     | ABXXXX      |
| <i>Aphodius sticticus</i>              | -         | ABXXXX     | -           |
| <i>Euoniticellus fulvus</i>            | ABXXXX    | ABXXXX     | ABXXXX      |
| <i>Geotrupes stercorarius (OUT)</i>    | KP419463  | AY039377   | AY039377    |
| <i>Onthophagus fracticornis</i>        | ABXXXX    | -          | -           |
| <i>Onthophagus grossepunctatus</i>     | ABXXXX    | AY039347   | AY039347    |
| <i>Onthophagus lemur</i>               | ABXXXX    | AY039353   | AY039353    |
| <i>Onthophagus opacicollis</i>         | -         | ABXXXX     | ABXXXX      |
| <i>Onthophagus ovatus</i>              | ABXXXX    | AY039351   | AY039351    |
| <i>Onthophagus similis</i>             | ABXXXX    | ABXXXX     | ABXXXX      |
| <i>Onthophagus vacca</i>               | ABXXXX    | AY039359   | AY039359    |
| <i>Taurocerastes patagonicus (OUT)</i> | KP419662  | GU984611   | GU984611    |

**Table S1.** GenBank accession numbers of the used sequences. Outgroup species are indicated.
